# Supplementary figures and images for: Distribution and Risk of Cutaneous Leishmaniasis in Khyber Pakhtunkhwa, Pakistan
Source: MDPI journal article supplement (doi:10.3390/tropicalmed8020128), 2023-02-20

## Supplementary Figure S1.

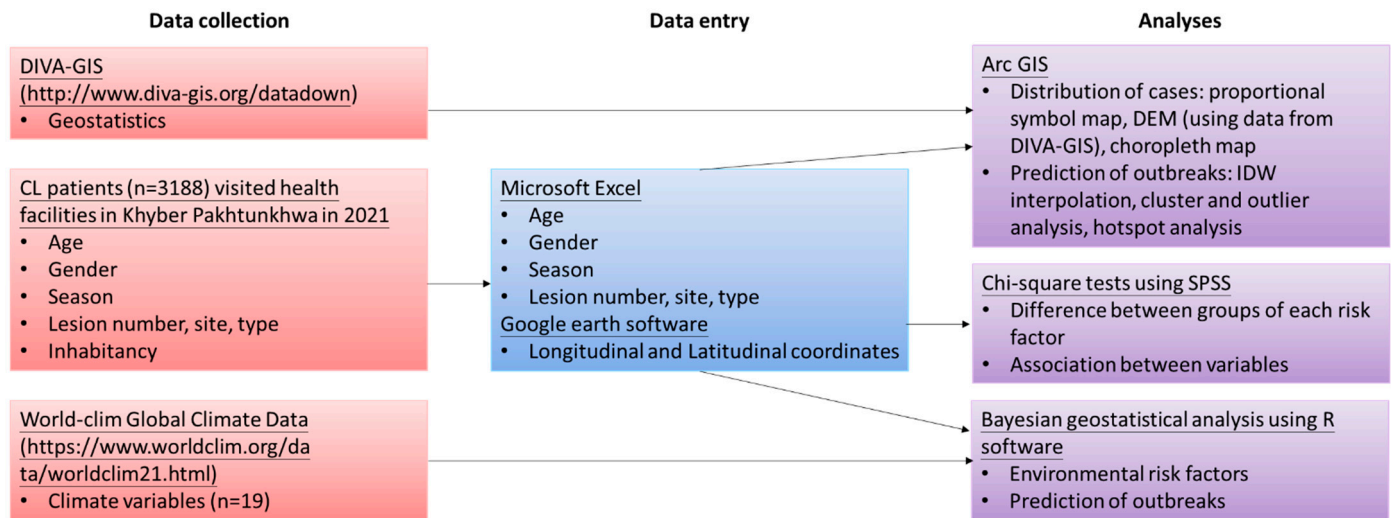

**Figure S1.** Flowchart of the study.

Supplement: s1 [file s1]
